# Supplementary material
Source: MDPI journal article supplement (https://www.mdpi.com/2311-7524/8/2/107)

Figure S1. Palm tree

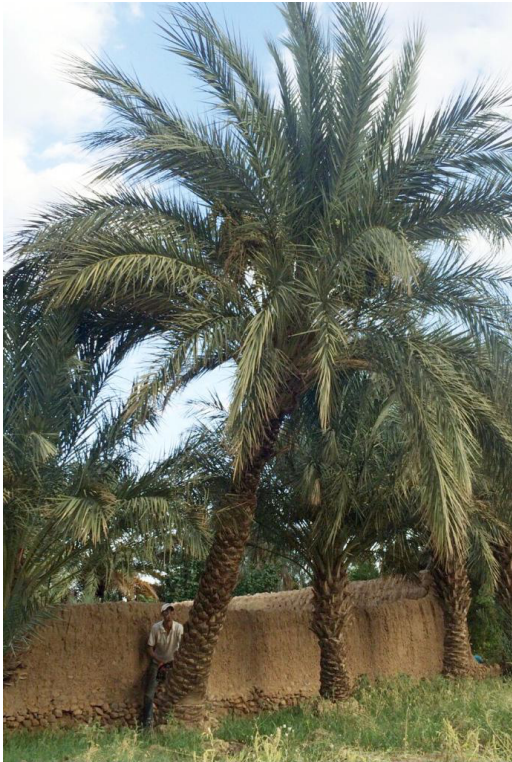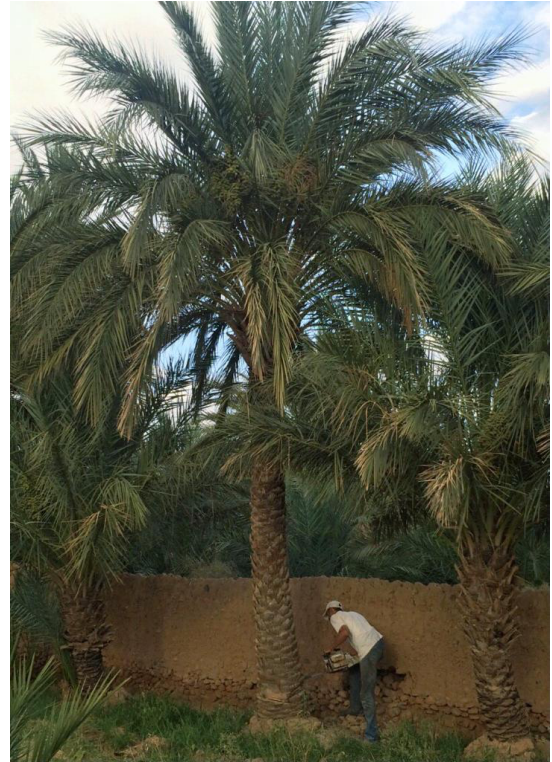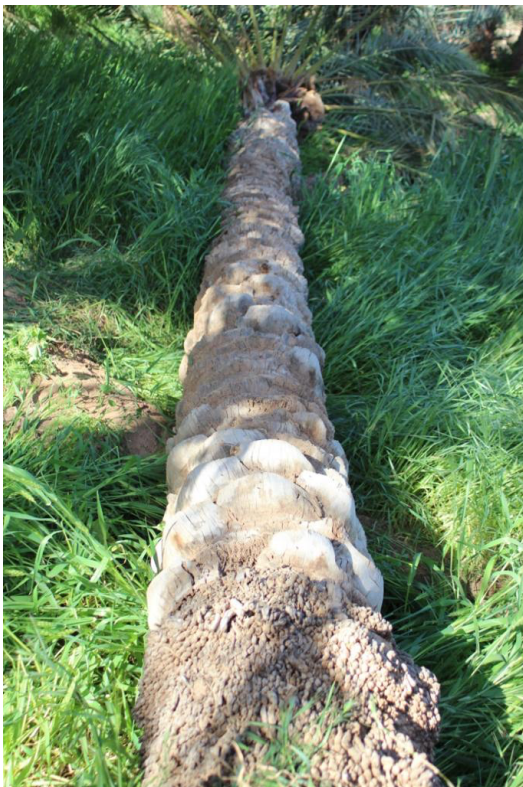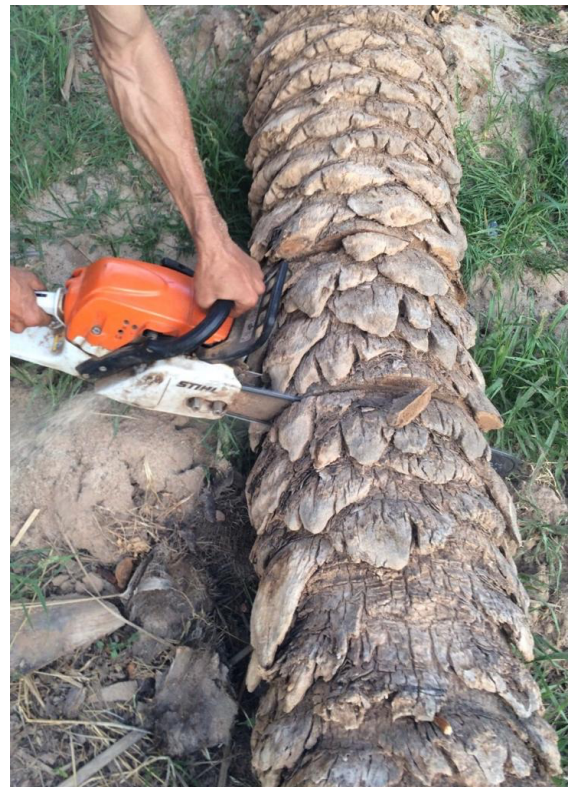

Supplement: s1 [file s1]
